# Supplementary material for: Awareness and Prevalence of Mycotoxin Contamination in Selected Nigerian Fermented Foods
Source: PubMed Central journal article supplement (PMC5705978; doi:10.3390/toxins9110363), 2017-11-08
Supplement: toxins-09-00363-s001.pdf [file toxins-09-00363-s001.pdf]

# Questionnaire on Demographics, Practices, Understanding and Perceived Health Risk of Fungal and Mycotoxins Contamination amongst Fermented Food Sellers in Nigeria

(Instruction: Tick as appropriate)

## Food Type:

## Location:

### 1. Socio-demographic Variables

#### a) Gender

Male  Female

#### b) Age

<30 Years  31-50 Years  >50 Years

#### c) Education Level

None  Primary  Secondary  Tertiary

### 2. Fermented Food Characteristics

#### a) Fermented food source

Home processed  Purchased in the market  Purchased directly from processors

#### b) Storage duration of raw materials of the fermented food

1-3 Months  >3 Months  Not Applicable

#### c) Storage duration of fermented food before sale

1-7 Days  >7 Days

#### d) Storage method of raw materials of fermented food

Bags  Containers  Not Applicable

#### e) Storage method of fermented food before sale

Polyethylene bags  Containers  Paper  Leaves

Wooden boxes

#### f) Average shelf life of raw material of the fermented food

1 Month  >1 Month  Not Applicable

#### g) Average shelf life of the fermented food

1-3 Days  3-7 Days  >7 Days

#### h) Mode of consumption

Directly  As food ingredient  Both

### 3. Knowledge of Fungi, Mycotoxins and Health Effects

| S/N | Questions                                                                                              | Yes    |            | No             |
|-----|--------------------------------------------------------------------------------------------------------|--------|------------|----------------|
| 1   | Do you know what fungi are?                                                                            |        |            |                |
| 2   | Can you identify food/crops contaminated with fungi?                                                   |        |            |                |
| 3   | Do you experience fungal contamination in the fermented food you offer for sale?                       |        |            |                |
| 4   | How frequent do you experience fungal contamination?                                                   | Rarely | Frequently | Not Applicable |
| 5   | Why do you think fungal contamination occur?                                                           |        |            |                |
| 6   | Does fungal contamination of foodstuffs cause any health problem when contaminated foods are consumed? |        |            |                |
| 7   | Do you know fungi produce toxins called 'mycotoxins'?                                                  |        |            |                |
| 8   | Do you know the health effect associated with mycotoxin contamination?                                 |        |            |                |
| 9   | Are you willing to attend training on mycotoxins and how they can be reduced in our foods?             |        |            |                |

#### 4. Any other comment or suggestion(s)

-----

-----

-----

-----

-----

**THANK YOU**
